# Supplementary material for: Highly Selective Reduction of Bio-Based Furfural to Furfuryl Alcohol Catalyzed by Supported KF with Polymethylhydrosiloxane (PMHS)
Source: Hindawi journal article supplement (doi:10.1155/2020/4809127), 2020-01-28
Supplement: f1 [file 4809127.f1.pdf]

## Supporting Information

### **Highly selective reduction of bio-based furfural to furfuryl alcohol catalyzed by supported KF with polymethylhydrosiloxane (PMHS)**

Zhaozhuo Yu,<sup>#</sup> Weibo Wu,<sup>#</sup> Hu Li,<sup>\*</sup> Song Yang<sup>\*</sup>

## Characterization of catalysts

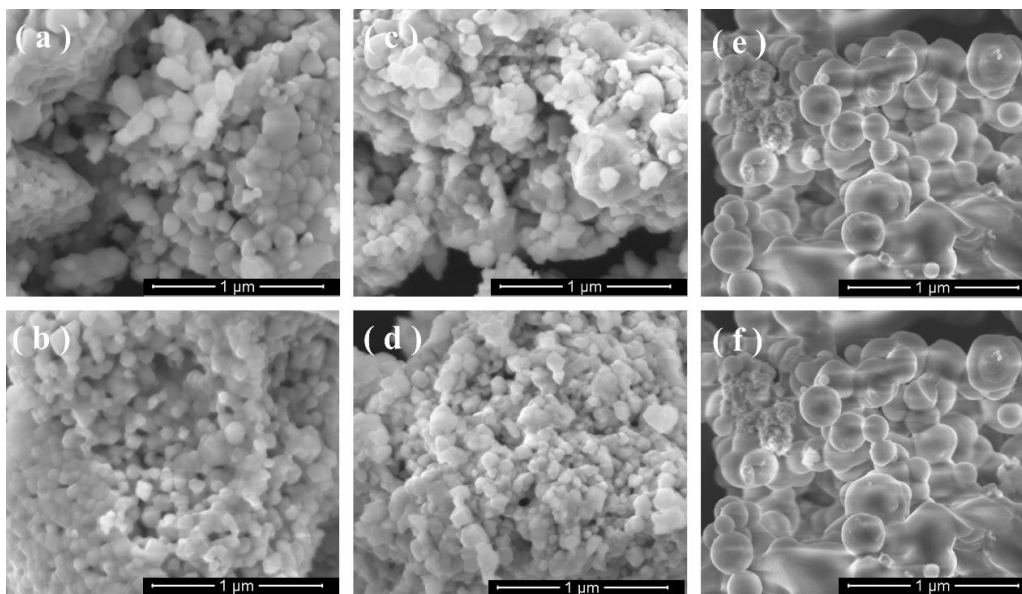

**Fig. S1.** SEM images of (a) ZrO<sub>2</sub>, (b) ZrO<sub>2</sub>, (c) 5wt% KF/ZrO<sub>2</sub>, (d) 5wt% KF/ZrO<sub>2</sub>, (e) 5wt% KF/ZrO<sub>2</sub> (after recycling 5 times), and (f) 5wt% KF/ZrO<sub>2</sub> (after recycling 5 times)

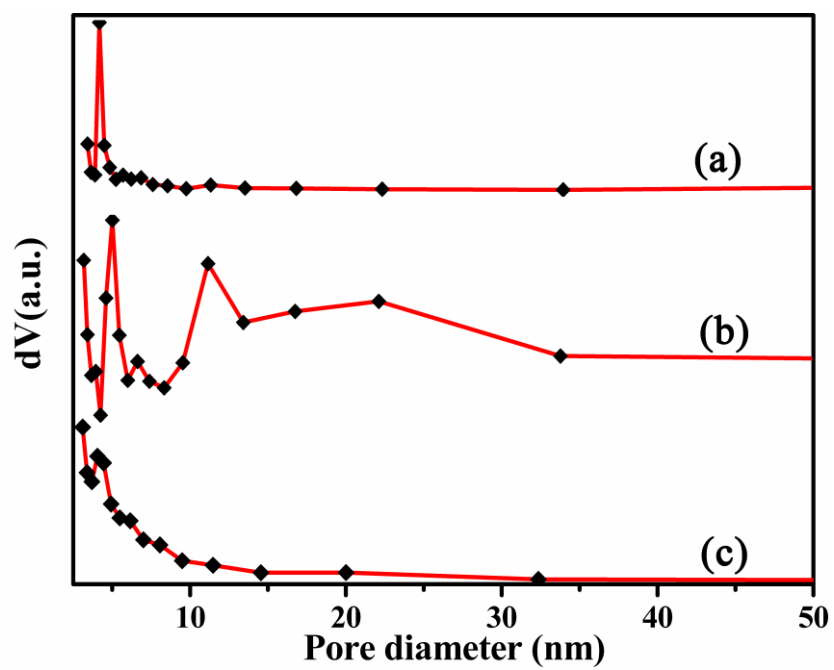

**Fig. S2.** Pore distribution analysis of (a)  $\text{ZrO}_2$ , (b) 5wt%  $\text{KF/ZrO}_2$ , and (c) 5wt%  $\text{KF/ZrO}_2$  (after recycling 5 times).

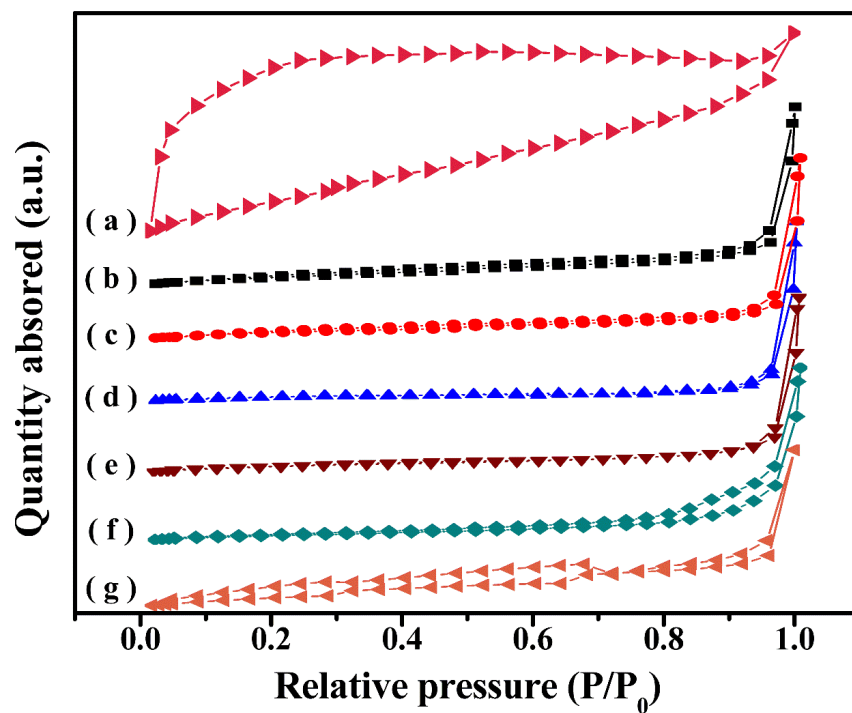

**Fig. S3.** N<sub>2</sub> adsorption-desorption isotherms of (a) 5wt% KF/ZrO<sub>2</sub> (after 5 times of repeated use) (b) ZrO<sub>2</sub>; (c) 1wt% KF/ZrO<sub>2</sub> (d) 2wt% KF/ZrO<sub>2</sub> (e) 3wt% KF/ZrO<sub>2</sub> (f) 5wt% KF/ZrO<sub>2</sub> (g) 15wt% KF/ZrO<sub>2</sub>

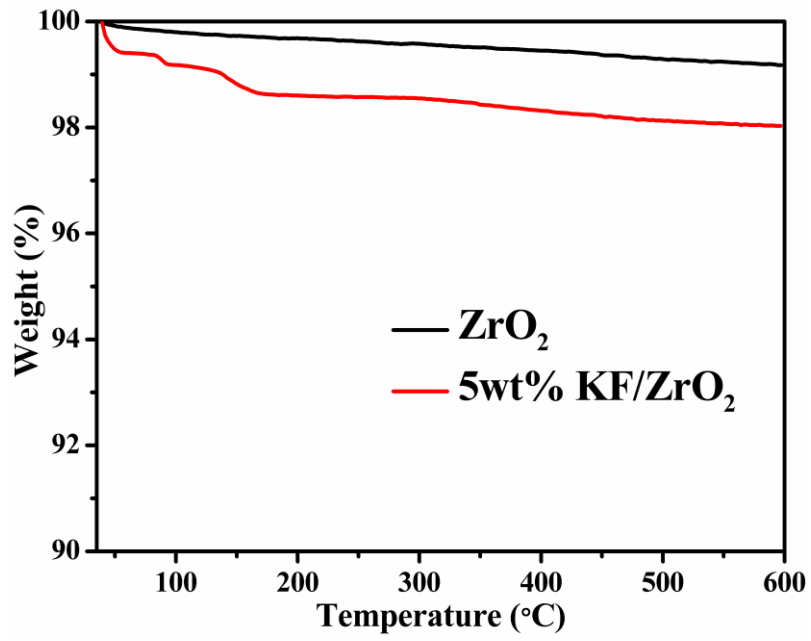

**Fig. S4.** TGA curves of  $\text{ZrO}_2$  and 5wt% $\text{KF/ZrO}_2$ .

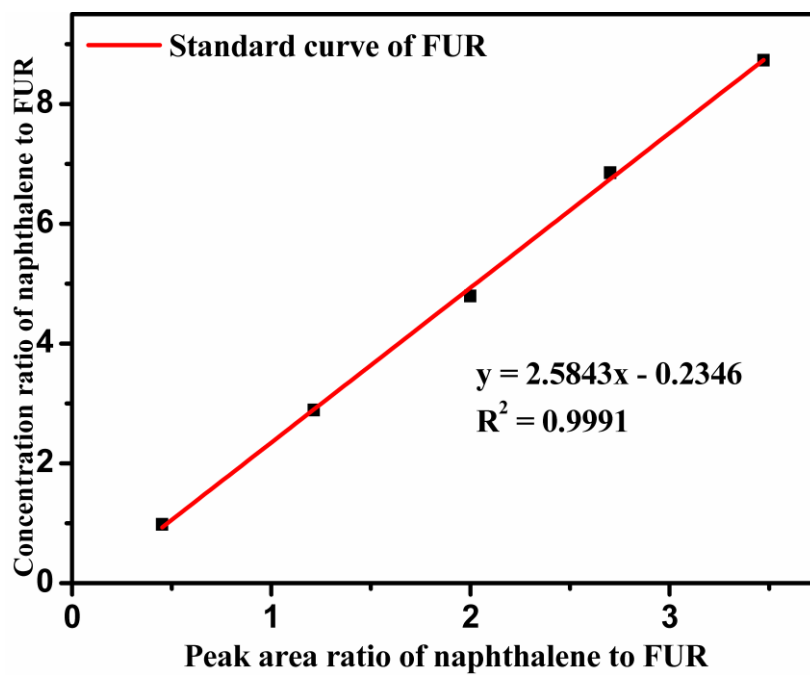

Fig. S5. Standard curve of FUR for GC analysis.

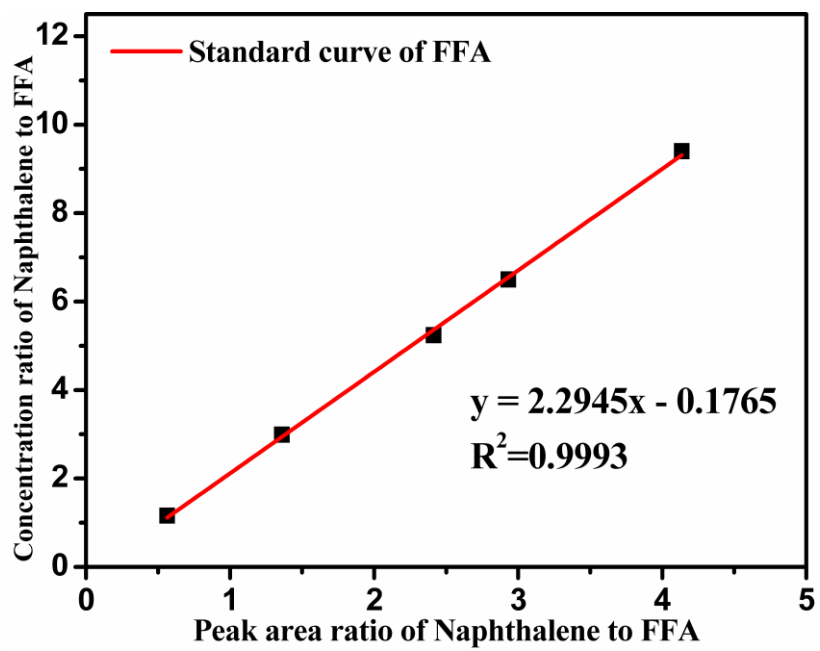

Fig. S6. Standard curve of FFA for GC analysis.
